# Supplementary material
Source: PubMed Central journal article supplement (PMC5003153)
Supplement: supp_M069021_069021_JLR_Supplemental_Figures.pdf [file supp_M069021_069021_JLR_Supplemental_Figures.pdf]

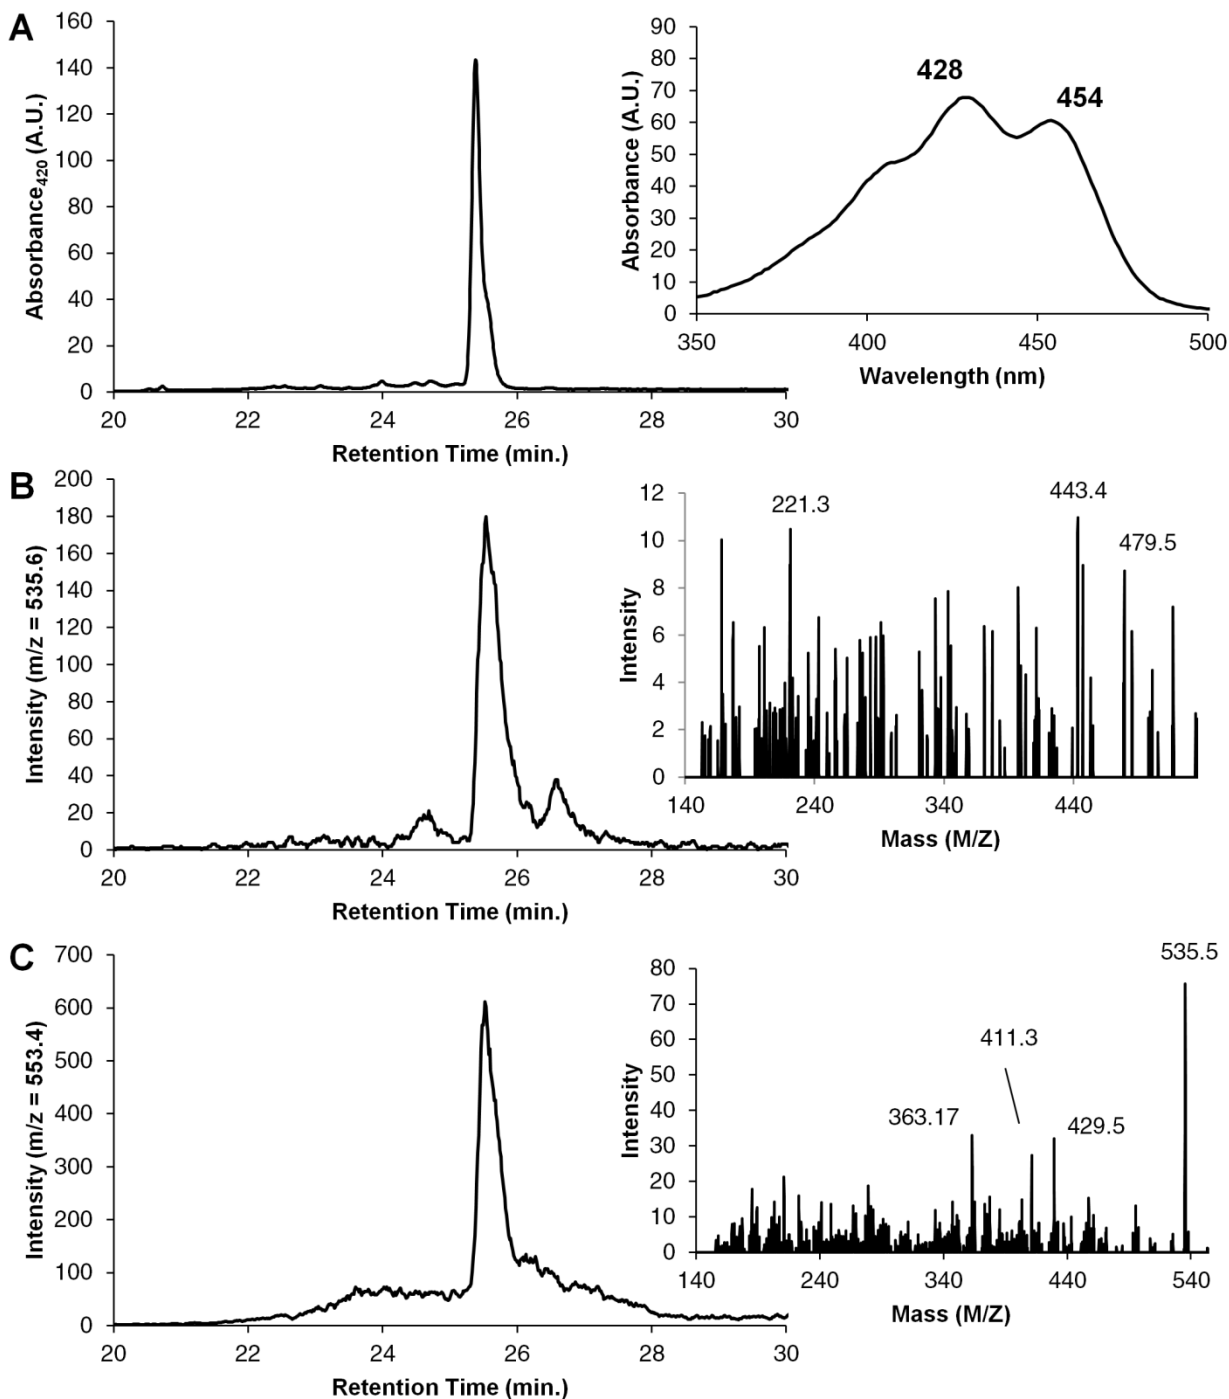

**Supplemental Figure S1. LC-MS and LC-MS/MS characterization of a  $\beta$ -carotene metabolite.** The previously observed  $\beta$ -carotene metabolite was separated by normal-phase HPLC and collected.

Following this, the metabolite was subjected to reverse-phase HPLC, MS, and MS/MS analysis. (A)

HPLC trace at 420 nm of  $\beta$ -carotene metabolite isolated from  $\beta$ -carotene fed mice. LC-MS trace at (B) m

$m/z = 535.6$  and **(C)**  $m/z = 553.4$ , the most abundant peaks that match the retention time of the unknown  $\beta$ -carotene metabolite. Insets on the right show MS/MS fragmentation patterns of these peaks.

**A**

| Gene         | Fold Change | p-value |
|--------------|-------------|---------|
| Arrdc3       | 2.40        | 0.003   |
| Hba-a1       | -1.68       | 0.029   |
| Hbb-b1       | -1.84       | 0.019   |
| LOC100047427 | 2.37        | 0.000   |
| Al850995     | -2.03       | 0.016   |
| Nr1d1        | 2.02        | 0.005   |

**B**

| Gene          | Fold Change | p-value |
|---------------|-------------|---------|
| Rnf186        | 2.19        | 0.018   |
| Sntg2         | 1.61        | 0.022   |
| Lzts2         | 1.56        | 0.003   |
| 0610008F07Rik | 1.70        | 0.024   |
| 2900006A08Rik | -1.80       | 0.003   |
| LOC380707     | 1.73        | 0.006   |
| Rhpn2         | -1.66       | 0.010   |
| LOC100043257  | 1.60        | 0.003   |
| Prkaa2        | -1.55       | 0.002   |
| Htati2        | 2.50        | 0.028   |
| Skil          | -1.64       | 0.000   |
| Dlat          | -1.54       | 0.032   |
| Decr1         | -1.67       | 0.038   |
| Sbk           | 1.65        | 0.033   |
| 1500011K16Rik | 1.50        | 0.019   |
| Sult1c2       | 2.00        | 0.049   |
| Rnf125        | -1.52       | 0.004   |
| Slc25a30      | -2.35       | 0.049   |
| Elovl2        | -1.60       | 0.011   |
| Plk3          | -1.87       | 0.040   |
| Hhex          | -2.10       | 0.019   |
| Spon2         | -1.66       | 0.019   |

**Supplemental Figure S2. Effect of carotenoid accumulation on the liver expressome.** Five-week old *Bco1<sup>-/-</sup> Bco2<sup>-/-</sup>* (DKO) female mice were supplemented on either a zeaxanthin (n = 5, control = 4) carotene (n = 5, control = 6) diet for 10 weeks. Liver  $\beta$ er -expressome was assessed by Illumina bead chip. Several genes were identified to have a significant change in expression in response to (A)  $\beta$ -carotene or (B) zeaxanthin supplementation

| Pathway                                                 | Genes with changes in expression in pathway | Genes in Pathway | p-value |
|---------------------------------------------------------|---------------------------------------------|------------------|---------|
| Trehalose Degradation II                                | 1                                           | 1                | 0.0058  |
| Aldosterone Signaling in Epithelial Cells               | 3                                           | 78               | 0.0102  |
| Type II Diabetes Mellitus                               | 3                                           | 80               | 0.0109  |
| Spermidine Biosynthesis                                 | 1                                           | 2                | 0.0116  |
| GDP Glucose Biosynthesis                                | 1                                           | 2                | 0.0116  |
| CREB Signaling in Neurons                               | 3                                           | 87               | 0.0137  |
| Glucose and Glucose 1 phosphate                         | 1                                           | 3                | 0.0173  |
| Melatonin Signaling                                     | 2                                           | 39               | 0.0212  |
| Pyridoxal 5' phosphate salvage pathway                  | 2                                           | 40               | 0.0222  |
| GPCR Mediated Nutrient Sensing in Enteroendocrine cells | 2                                           | 40               | 0.0222  |
| Methylmalonyl Pathway                                   | 1                                           | 4                | 0.0230  |
| 2-oxobutanote Degradation I                             | 1                                           | 5                | 0.0286  |
| UDP-N-acetyl-D-galactosamine Biosynthesis               | 1                                           | 5                | 0.0286  |
| Neuropathic Pain Signaling in Dorsal Horn Neurons       | 2                                           | 47               | 0.0301  |
| Salvage Pathways of Pyrimidine Ribonucleotides          | 2                                           | 51               | 0.0349  |
| Sperm Motility                                          | 2                                           | 52               | 0.0362  |
| Huntington's Disease Signaling                          | 3                                           | 130              | 0.0390  |
| Prostanoid Biosynthesis                                 | 1                                           | 7                | 0.0399  |
| Neuregulin Signaling                                    | 2                                           | 58               | 0.0442  |
| Synaptic Long Term Potentiation                         | 2                                           | 59               | 0.0455  |

**Supplemental Figure S3. Pathways with a significant change due to  $\beta$ -carotene supplementation.**

Results from differential liver expressome were analyzed computationally to assess which cellular pathways may have changed as a result of carotenoid accumulation. Complete list of pathways affected by  $\beta$ -carotene accumulation.

| Pathway                                               | Genes with changes in expression in pathway | Genes in Pathway | p-value |
|-------------------------------------------------------|---------------------------------------------|------------------|---------|
| Cholesterol Biosynthesis I                            | 4                                           | 12               | 0.0003  |
| Cholesterol Biosynthesis II (24,25 Dihydrolanosterol) | 4                                           | 12               | 0.0003  |
| Cholesterol Biosynthesis III (via Desmosterol)        | 4                                           | 12               | 0.0003  |
| Zymosterol Biosynthesis                               | 3                                           | 6                | 0.0005  |
| Mitochondrial Dysfunction                             | 7                                           | 111              | 0.0017  |
| Prostate Cancer Signaling                             | 7                                           | 59               | 0.0017  |
| BMP Signaling                                         | 6                                           | 46               | 0.0022  |
| Superpathway of Cholesterol Biosynthesis              | 4                                           | 22               | 0.0037  |
| Regulation of IL-2 Expression in Lymphocytes          | 6                                           | 54               | 0.0051  |
| ATM signaling                                         | 5                                           | 41               | 0.0070  |
| Estrogen Dependent Breast Cancer Signaling            | 5                                           | 42               | 0.0078  |
| Myc Mediated Apoptosis                                | 5                                           | 45               | 0.0104  |
| Rac Signaling                                         | 6                                           | 65               | 0.0124  |
| Circadian Rhythm Signaling                            | 3                                           | 17               | 0.0130  |
| P2Y Purinergic Receptor Signaling Pathway             | 6                                           | 66               | 0.0134  |
| PI3k/AKT Signaling                                    | 7                                           | 87               | 0.0147  |
| ERK5 Signaling                                        | 5                                           | 49               | 0.0147  |
| B Cell Recognition Signaling                          | 8                                           | 110              | 0.0166  |
| NGF Signaling                                         | 6                                           | 70               | 0.0175  |
| Antiproliferative Role of TOB in T Cell Signaling     | 3                                           | 21               | 0.0233  |
| Triacylglycerol Biosynthesis                          | 3                                           | 21               | 0.0233  |
| T Cell Receptor Signaling                             | 5                                           | 57               | 0.0267  |
| Epoxycholesterol Biosynthesis                         | 1                                           | 1                | 0.0298  |
| L DOPA Degradation                                    | 1                                           | 1                | 0.0298  |
| Sorbitol Degradation                                  | 1                                           | 1                | 0.0298  |
| Synaptic Long Term Potentiation                       | 5                                           | 59               | 0.0305  |
| FcyRIIB Signaling in B Lymphocytes                    | 3                                           | 24               | 0.0333  |
| GNRH Signaling                                        | 6                                           | 82               | 0.0349  |
| Neurotrophin/TRK Signaling                            | 4                                           | 43               | 0.0381  |
| PKC0 Signaling in T Lymphoma                          | 5                                           | 64               | 0.0412  |
| Chronic Myeloid Leukemia Signaling                    | 5                                           | 65               | 0.0437  |
| Oxidative Phosphorylation                             | 5                                           | 65               | 0.0437  |
| IL-17 Signaling                                       | 4                                           | 45               | 0.0441  |
| ERK/MAPK Signaling                                    | 7                                           | 110              | 0.0454  |
| Polyamine Regulation in Colon Cancer                  | 2                                           | 12               | 0.0479  |

**Supplemental Figure S4. Pathways with a significant change due to zeaxanthin supplementation.**

Results from differential liver expressome were analyzed computationally to assess which cellular pathways may have changed as a result of carotenoid accumulation. Complete list of pathways affected by zeaxanthin accumulation.

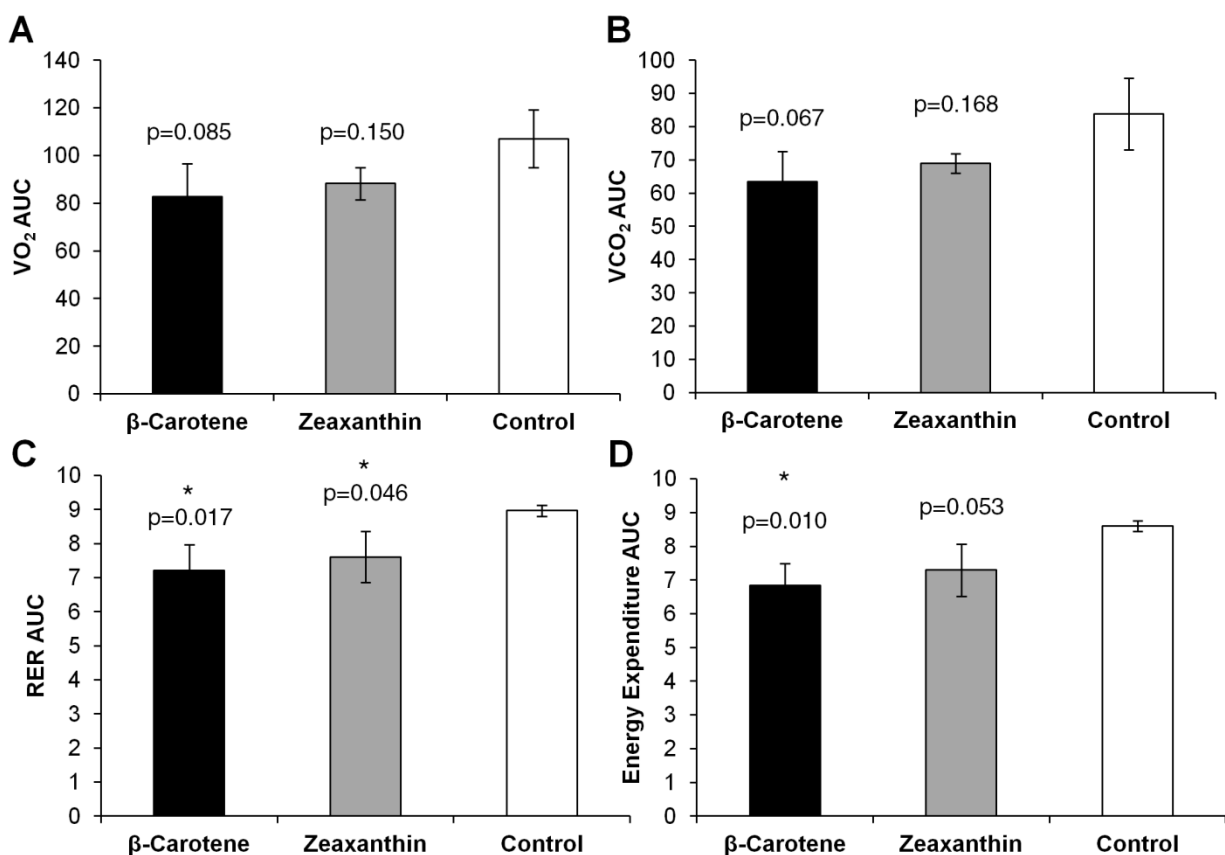

**Supplementary Figure S5. Carotenoid accumulation effects whole body respiration rates as area under the curve (AUC).** Five-week old *Bco1<sup>-/-</sup> Bco2<sup>-/-</sup>* (DKO) female mice were supplemented on either  $\beta$ -carotene (n = 3), zeaxanthin (n = 3), or a control carotenoid-free diet (n = 3) for 10-weeks.

Mice were then subjected to whole-body respiration analysis. (A) Oxygen consumption and carbon dioxide production were measured every 15 minutes for 6 hours. (B) Average values of oxygen consumption and (C) carbon dioxide production were lower in the carotenoid fed group. (D) Respiration quotient was calculated as the ratio of oxygen consumption to carbon dioxide production. (E) Total energy expenditure was then calculated from these values. Values are means, error bars represent standard error, p-values are given as compared to control mice.
